# Supplementary material
Source: HighWire-hosted journal article supplement (https://jcp.bmj.com/highwire/filestream/198266/field_highwire_adjunct_files/5/jcp-2022-208541supp006_data_supplement.pdf)
Supplement: jcp-2022-208541supp006_data_supplement.pdf [file jcp-2022-208541supp006_data_supplement.pdf]

| Sample ID                       | CATWDRPEKLF<br>Frequency |
|---------------------------------|--------------------------|
| ACD_IE_462_TCRGD__T_CELLS       | 0.601                    |
| ACD_IE_462_UNSORTED_IEs         | 0.329                    |
| ACD_IE_472_TCRGD__T_CELLS       | 0.484                    |
| ACD_IE_472_UNSORTED_IEs         | 0.194                    |
| GFD_IE_487_TCRGD__T_CELLS       | 0.948                    |
| GFD_IE_487_UNSORTED_IEs         | 0.301                    |
| GFD_IE_490_TCRGD__T_CELLS       | 1.051                    |
| GFD_IE_490_UNSORTED_IEs         | 0.232                    |
| Control_IE_24247_TCRGD__T_CELLS | 0.000                    |
| Control_IE_24247_UNSORTED_IEs   | 0.003                    |
| Control_IE_24330_TCRGD__T_CELLS | 0.000                    |
| Control_IE_24330_UNSORTED_IEs   | 0.012                    |

| Sample ID                       | CATWDGLNYYKKLF<br>Frequency |
|---------------------------------|-----------------------------|
| ACD_IE_462_TCRGD__T_CELLS       | 0.042                       |
| ACD_IE_462_UNSORTED_IEC         | 0.003                       |
| ACD_IE_472_TCRGD__T_CELLS       | 0.000                       |
| ACD_IE_472_UNSORTED_IEC         | 0.012                       |
| GFD_IE_487_TCRGD__T_CELLS       | 0.225                       |
| GFD_IE_487_UNSORTED_IEC         | 0.228                       |
| GFD_IE_490_TCRGD__T_CELLS       | 0.000                       |
| GFD_IE_490_UNSORTED_IEC         | 0.021                       |
| Control_IE_24247_TCRGD__T_CELLS | 0.099                       |
| Control_IE_24247_UNSORTED_IEC   | 0.024                       |
| Control_IE_24330_TCRGD__T_CELLS | 0.026                       |
| Control_IE_24330_UNSORTED_IEC   | 0.012                       |
